# Supplementary material
Source: publisher site journal article supplement (https://www.dovepress.com/get_supplementary_file.php?f=465079.docx)
Supplement: Supplementary file 1 [file get_supplementary_file.php]

**Supplementary Table S1.** Distribution of the responses for each knowledge item

| Items, n (%) | Know well | Partially know | Don’t know |
| --- | --- | --- | --- |
| 1. Drug therapy for lung cancer includes chemotherapy, molecularly targeted therapy, and immunotherapy. | 158 (82.7) | 32 (16.8) | 1 (0.5) |
| 2. Molecular targeted therapy requires the identification of the mutation status and is guided by molecular typing. Patients with EGFR mutation, ALK fusion-positive, or ROS1 fusion-positive can choose the appropriate molecularly targeted drugs. | 105 (55.0) | 82 (42.9) | 4 (2.1) |
| 3. Third-generation EGFR-TKI is the first-line therapeutic option for advanced non-small cell lung cancer carrying common EGFR mutations. | 145 (75.9) | 35 (18.3) | 11 (5.8) |
| 4. Based on present studies, it has been reported that the positivity rate of T790M mutation in tissue samples reached more than 50% after EGFR tyrosine kinase inhibitor (TKI) resistance. | 92 (48.2) | 85 (44.5) | 14 (7.3) |
| 5. In addition to irreversible binding to EGFR, osimertinib overcomes the common T790M drug resistance mutation in the first and second generations and is the only third-generation EGFR-TKI drug included in medical insurance in China. | 82 (42.9) | 85 (44.5) | 147 (7.3) |
| 6. The triple EGFR mutations [Del (19)/T790M/C797S or L858R/T790M/C797S in cis or trans] that are resistant to osimertinib have been reported. | 113 (59.2) | 62 (32.5) | 16 (8.4) |
| 7. G1202R and L1196M mutations are the main resistance mechanisms to the previous second-generation ALK inhibitors. | 114 (59.7) | 61 (31.9) | 16 (8.4) |
| 8. Several fourth-generation targeted lung cancer drugs have already been tested in clinical trials. | 88 (46.1) | 84 (44.0) | 19 (10.0) |
| 9. Targeted drugs have some toxic side effects, including rash, diarrhea, liver damage, and, in some patients, interstitial pneumonia. | 160 (83.8) | 27 (14.1) | 4 (2.1) |
| 10. After taking a first-generation EGFR TKI, the median time to disease progression in patients with EGFR mutated lung cancer is 10-14 months; in case of oligoprogression or CNS progression after resistance to first-line molecular targeted therapy, targeted therapy may be continued in combination with local treatment, such as radiotherapy or surgery. | 154 (80.6) | 31 (16.2) | 6 (3.1) |
| 11. For patients who are resistant to first-line EGFR-TKI or the ALK-TKI, second-line treatment can also be a combination of double or single platinum-containing agent chemotherapy based on the patient’s Eastern Cooperative Oncology Group performance status score, or in the case of non-squamous cancers, an anti-vascular agent such as bevacizumab can be combined on the above basis. | 152 (79.6) | 29 (15.2) | 10 (5.2) |
| 12. When taking targeted drugs, it should be on time and in the right dosage to avoid any sudden increase or decrease in dosage and to avoid fruits with high furanocoumarin content, such as grapefruit, Seville oranges, and Israeli grapefruit. | 149 (78.0) | 32 (16.8) | 10 (5.2) |
| 13. First-generation EGFR-targeting drugs are represented by: | Gefitinib: 17 (92.7)  Erlotinib: 154 (80.6)  Ecatinib: 113 (59.2)  Don’t know: 6 (3.1) | | |
| 14. Second-generation EGFR-targeting agents are represented by: | Afatinib: 163 (85.3)  Daclotinib: 142 (74.4)  Don’t know: 6 (3.1) | | |
| 15. Third-generation EGFR-targeting agents are represented by: | Osimertinib: 170 (89.0)  Ametinib: 143 (74.9)  Don’t know: 9 (4.7) | | |
| 16. First-generation ALK-targeting drugs are represented by: | Crizotinib: 170 (89.0)  Don’t know: 9 (4.7) | | |
| 17. Second-generation ALK-targeting agents are represented by: | Ceritinib: 151 (79.1)  Alectinib: 133 (69.6)  Brigatinib: 87 (45.6)  Afatinib: 10 (5.2)  Don’t know: 11 (5.8) | | |
| 18. Third-generation ALK-targeting agents are represented by: | Lauratinib: 150 (78.5)  Don’t know: 129 (6.3) | | |

Those questions were directly translated from the original Chinese. They were not formally translated and are for indicative purpose only.

**Supplementary Table S2.** Distribution of the responses for each attitude item

| Items, n (%) | Strongly agree | Agree | Neutral | Disagree | Strongly disagree |
| --- | --- | --- | --- | --- | --- |
| 1. All patients with driver gene mutation-positive lung cancer should receive targeted therapy. | 117 (61.3) | 61 (31.9) | 12 (6.3) | 1 (0.5) | 0 |
| 2. Which of the following concerns you would have when taking targeted drugs: |  |  |  |  |  |
| 2.1 The clinical benefits | 155 (81.1) | 25 (13.1) | 7 (3.7) | 4 (2.1) | 0 |
| 2.2 The impact on departmental or hospital effectiveness | 59 (30.9) | 83 (43.465 | 33 (17.3) | 13 (6.8) | 3 (1.6) |
| 2.3 Adverse effects of the drugs and patient tolerability | 154 (80.6) | 28 (14.667 | 7 (3.8) | 2 (1.1) | 0 |
| 2.4 The patient’s personal wishes | 147 (77.0) | 32 (16.8) | 10 (5.2) | 1 (0.5) | 1 (0.5) |
| 2.5 Whether the drugs are covered by medical insurance | 89 (46.6) | 69 (36.1) | 29 (15.2) | 3 (1.6) | 1 (0.5) |
| 3. To what extent do you approve of the use of targeted drugs for the treatment of lung cancer: | 95 (49.7) | 83 (43.5) | 11 (5.8) | 1 (0.5) | 1 (0.5) |
| 4. You still doubt the clinical benefits of targeted therapy for lung cancer. | 27 (14.1) | 25 (13.1) | 44 (23.0) | 65 (34.0) | 30 (15.7) |
| 5. You think there is hope that targeted therapy will “overcome” lung cancer. | 377 (19.4) | 84 (44.0) | 51 (26.7) | 15 (7.9) | 4 (2.1) |
| 6. If you have the opportunity, you would like to conduct research on targeted therapy for lung cancer. | 144 (75.4) | 36 (18.9) | 9 (4.7) | 1 (0.5) | 1 (0.5) |

Those questions were directly translated from the original Chinese. They were not formally translated and are for indicative purpose only.

**Supplementary Table S3.** Distribution of the responses for each practice item

| Items, n (%) | Always | Often | Sometimes | Occasionally | Never |
| --- | --- | --- | --- | --- | --- |
| 1. In your clinical practice, you can recommend targeted therapy to appropriate lung cancer patients in accordance with the relevant guidelines. | 150 (78.5) | 33 (17.3) | 7 (3.7) | 0 | 1 (0.5) |
| 2. In clinical practice, do you hesitate to recommend targeted therapy to patients? | 10 (5.2) | 26 (13.6) | 33 (17.3) | 84 (44.0) | 38 (19.9) |
| 3. You will explain accurately the pros and cons of targeted therapy to patients who meet the guidelines for targeted therapy. | 152 (79.6) | 27 (14.1) | 10 (5.2) | 1 (0.5) | 1 (0.5) |
| 4. You will help patients understand the information to weigh it up and make decisions on targeted therapy together with them. | 148 (77.5) | 30 (15.7) | 11 (5.8) | 0 | 5 (1.1) |
| 5. For patients undergoing targeted therapy for lung cancer, you will clearly inform them of the precautions to be taken during targeted therapy (including diet, dose, duration of dosing, etc.) and the possible side effects. | 153 (80.1) | 26 (13.6) | 9 (4.7) | 2 (1.051 | 1 (0.5) |
| 6. You will proactively follow research developments in targeted therapy for lung cancer. | 109 (57.1) | 67 (35.1) | 14 (7.3) | 0 | 1 (0.5) |

Those questions were directly translated from the original Chinese. They were not formally translated and are for indicative purpose only.
